# Supplementary material
Source: PubMed Central journal article supplement (PMC4042151)
Supplement: jcbn13-78s03.pdf [file jcbn13-78s03.pdf]

**Supplemental Table 3.** Correlation coefficients (effect sizes) from multivariate Ridge regression analysis among factors related to anthropometry and lifestyle on the one hand and plasma concentrations of lipoprotein constituents on the other

|             | Pla-C              | Pla-P               | Pla-ApoB           | Pla-ApoA1          | Pla-ApoA2          | Pla-ApoC2          | Pla-ApoC3          | Pla-ApoE           | Pla-T              |
|-------------|--------------------|---------------------|--------------------|--------------------|--------------------|--------------------|--------------------|--------------------|--------------------|
| R           | 0.412              | 0.485               | 0.484              | 0.439              | 0.432              | 0.382              | 0.45               | 0.385              | 0.391              |
| Age         | 0.350 <sup>†</sup> | 0.286 <sup>†</sup>  | 0.339 <sup>†</sup> | 0.112              |                    | 0.141              | 0.181*             | 0.225 <sup>†</sup> | 0.121              |
| BMI         |                    |                     | 0.136              | -0.157*            |                    | 0.202 <sup>†</sup> | 0.216 <sup>†</sup> | 0.189*             | 0.264 <sup>†</sup> |
| Smoking     |                    |                     |                    |                    | -0.111             |                    |                    |                    |                    |
| ActEnExp    |                    |                     | -0.181*            | 0.141              |                    |                    |                    |                    | -0.144             |
| Alc_Int     |                    | 0.181*              | -0.115             | 0.334 <sup>†</sup> | 0.366 <sup>†</sup> |                    |                    | 0.132              |                    |
| Carb_Int    | -0.144*            | -0.192 <sup>†</sup> |                    | -0.151             |                    | -0.175*            | -0.138             |                    |                    |
| PUFA_Int    |                    |                     |                    |                    |                    | 0.159*             | 0.144*             |                    |                    |
| Vit_A_Int   |                    |                     |                    |                    |                    | -0.137             | -0.173*            |                    |                    |
| Biotin_Int  |                    |                     | -0.123             |                    |                    |                    |                    |                    |                    |
| Vit_B12_Int |                    |                     |                    |                    |                    |                    | 0.141              |                    |                    |
| Niacin_Int  |                    | 0.119               | 0.142              |                    |                    |                    |                    |                    | 0.167*             |
