# Supplementary material
Source: PubMed Central journal article supplement (PMC4042151)
Supplement: jcbn13-78s06.pdf [file jcbn13-78s06.pdf]

**Supplemental Table 6.** Significant (<0.05) Ridge correlation coefficients for the intake of nutrients and ratios of concentrations of cholesterol and apolipoproteins in the lipoprotein fractions LDL and HDL as well as in the subfractions lLDL, sdLDL, and HDL2

|            | nonHDL-C           | sdLDL-C/lbLDL-C    | sdLDL-ApoB/lbLDL-ApoB | LDL-C/HDL-C         | sdLDL-C/HDL2-C      | ApoB/ApoA1          | sdLDL-ApoB/HDL2-ApoA1 |
|------------|--------------------|--------------------|-----------------------|---------------------|---------------------|---------------------|-----------------------|
| R          | 0.432              | 0.401              | 0.387                 | 0.515               | 0.392               | 0.369               | 0.393                 |
| Age        | 0.339 <sup>†</sup> |                    |                       | 0.205*              | 0.188*              | 0.170*              | 0.187*                |
| BMI        | 0.157*             | 0.240 <sup>†</sup> | 0.223 <sup>†</sup>    | 0.199*              | 0.198*              | 0.159*              | 0.194*                |
| ActEnExp   | -0.156*            | -0.137             | -0.137                | -0.210*             | -0.166*             | -0.153              | -0.167*               |
| Alc_Int    |                    |                    |                       | -0.374 <sup>†</sup> | -0.229 <sup>†</sup> | -0.253 <sup>†</sup> | -0.232 <sup>†</sup>   |
| MUFA_Int   |                    | -0.194*            | -0.187*               |                     |                     | -0.129              |                       |
| Biotin_Int |                    |                    |                       | -0.176*             |                     |                     |                       |
| Niacin_Int |                    |                    |                       | 0.150               |                     | 0.137               |                       |
| Vit_B1_Int |                    | 0.225 <sup>†</sup> | 0.231 <sup>†</sup>    |                     |                     |                     |                       |
| Vit_D_Int  |                    | 0.219*             | 0.209*                |                     |                     |                     |                       |
| Sodium_Int |                    |                    |                       |                     | 0.136               |                     | 0.145                 |
